# Supplementary material
Source: Springer Nature journal article supplement (https://www.springermedizin.de/resource/supplementary/12943_2011_1023_MOESM6_ESM.pdf/9552072)

a)

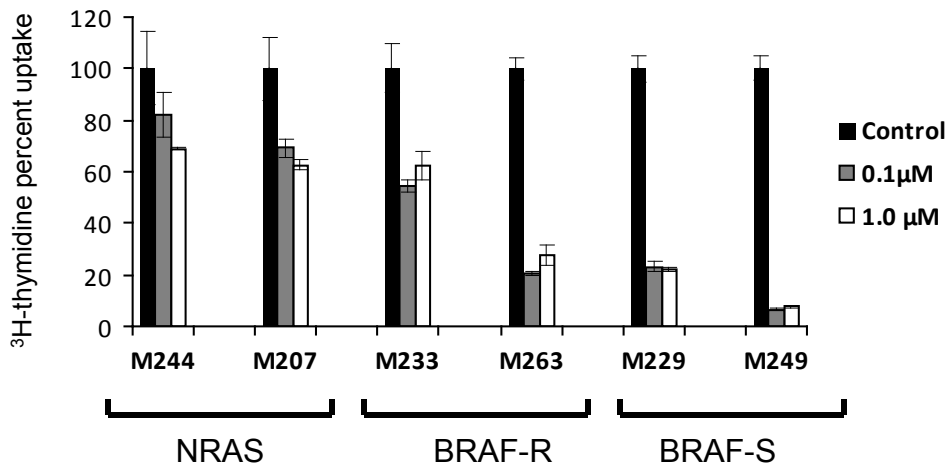

b)

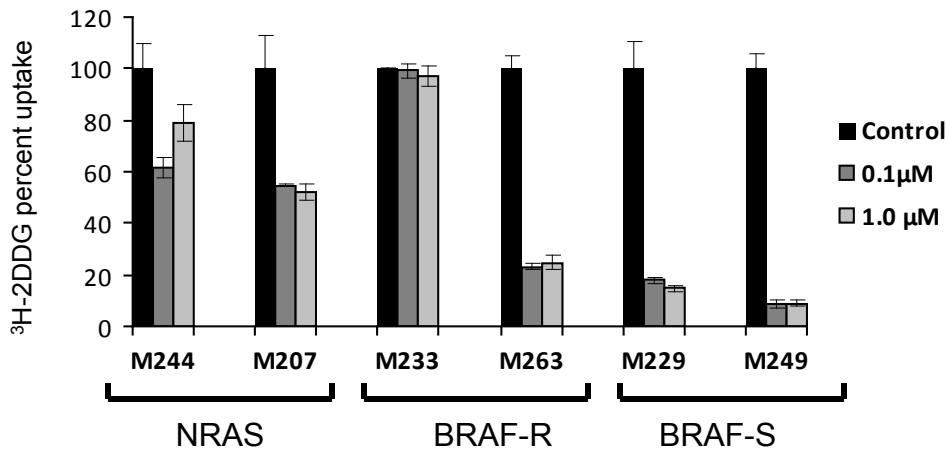

Supplement: MOESM6 [file 9552072]
